# Supplementary material for: Series of highly stable Cd(ii)-based MOFs as sensitive and selective sensors for detection of nitrofuran antibiotic
Source: Royal Society of Chemistry journal article supplement (doi:10.1039/d1ce01264a), 2021-01-01
Supplement: d1ce01264a1.pdf [file d1ce01264a1.pdf]

# Supporting Information

## Series of Highly stable Cd(II)-based coordination polymers for sensitive and selective detection of nitrofurantoin antibiotics

### Experimental

#### *Materials and Method*

All the reagents to perform synthesis obtained from commercial sources were of analytical grade. The ligand 5-(4'-carboxylphenoxy)isophthalic acid, 3,6-bis(imidazol-1-yl)-9H-carbazole, 1,1'-(1,4-butanediyl)bis(imidazole), 1,4-bis(1-imidazolyl)benzene, 2-imidazol-1-ylpyridine was purchased from chemical company and used without further purification. Powder X-ray diffraction (PXRD) data were collected using Bruker ADVANCE X-ray diffractometer with Cu-K $\alpha$  radiation ( $\lambda=1.5418 \text{ \AA}$ ) at 50 kV, 20 mA with a scanning rate of  $6^\circ/\text{min}$  and a step size of  $0.02^\circ$ . Fourier transform infrared (FT-IR) spectra for both the MOFs as KBr discs were recorded on Nicolet Impact 750 FTIR in the range of  $400\text{-}4000 \text{ cm}^{-1}$ . Thermogravimetric analyses (TGA) were performed under nitrogen atmosphere from room temperature to  $900 \text{ }^\circ\text{C}$  at a heating rate of  $10 \text{ }^\circ\text{C min}^{-1}$ . The photocatalytic investigations were carried out using Shimadzu UV-Vis 2501PC recording spectrophotometer. Nitrogen adsorption-desorption measurements were performed at  $77 \text{ K}$  in a liquid nitrogen bath on a Micromeritics ASAP 3020 analyzer. The sample was first degassed at  $80 \text{ }^\circ\text{C}$  for  $10 \text{ h}$  to remove the adsorbed solvents before measurement. The Brunauer-Emmett-Teller (BET) method was used to calculate the specific surface areas ( $S_{\text{BET}}$ ).

### X-ray Crystallography

The single crystal X-ray diffraction data for both the MOFs were collected on a Bruker SMART APEX diffractometer which was equipped with graphite monochromated MoK $\alpha$  radiation ( $\lambda = 0.71073 \text{ \AA}$ ) by using an  $\omega$ -scan technique. The structures were solved by direct method (SHLEXS-2014) and refined using the full-matrix least-square procedure based on  $F^2$  (Shelxl-2014). All the hydrogen atoms were generated geometrically and refined isotropically using a riding model. All non-

hydrogen atoms were refined with anisotropic displacement parameters. Crystallographic details and selected bond dimensions for **1-4** are listed in Tables S1 and S2, respectively. CCDC numbers: 2102107- 2102110.

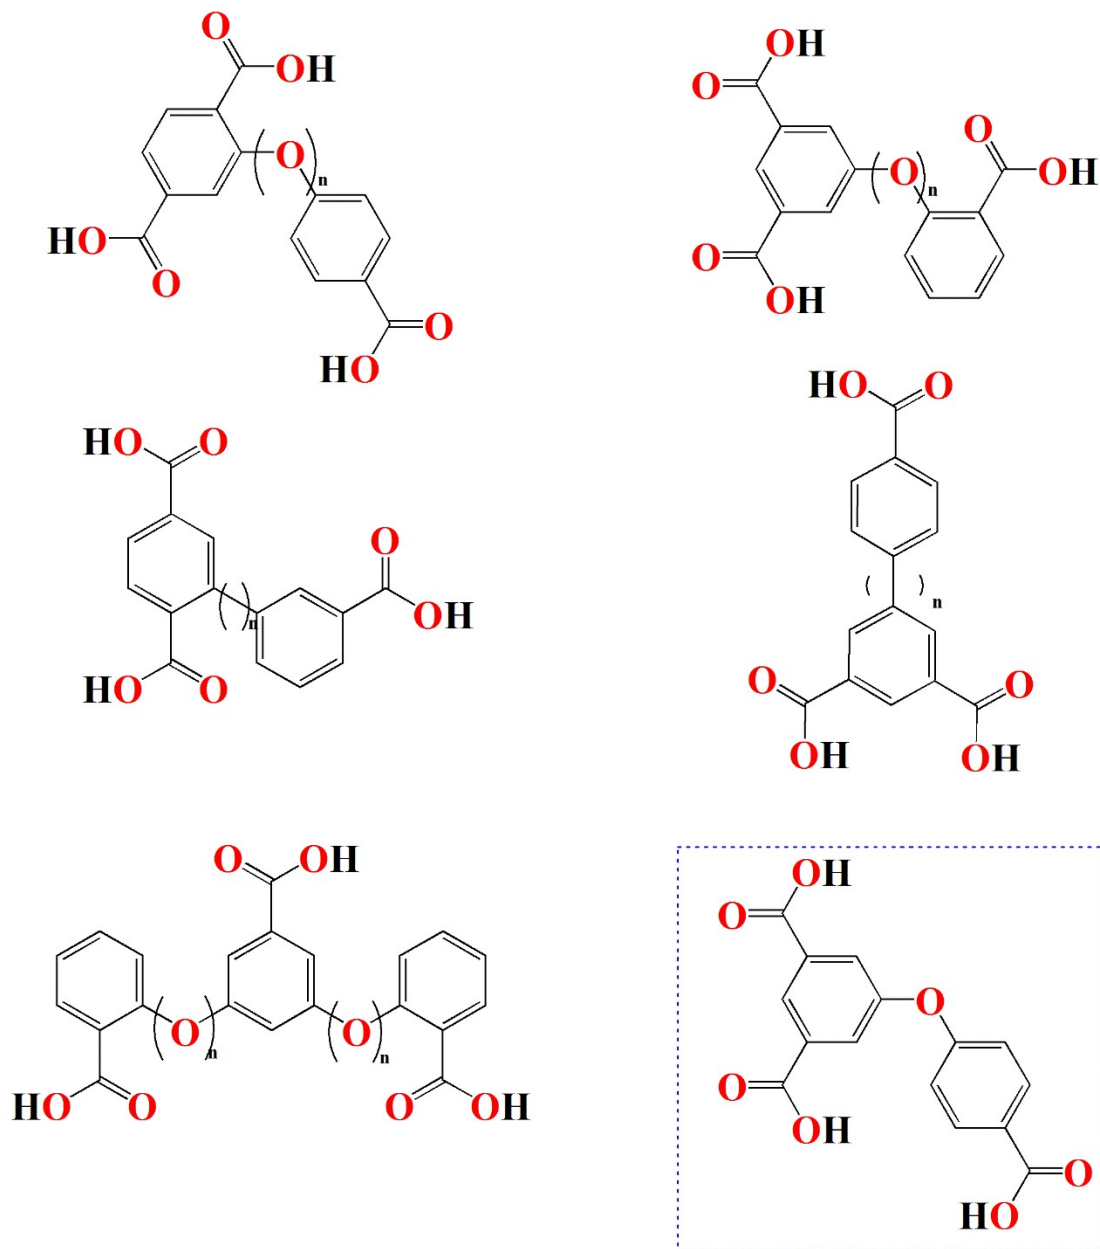

Scheme S1 representative tricarboxylate linker as confirmed by a search of the Cambridge Structural Database

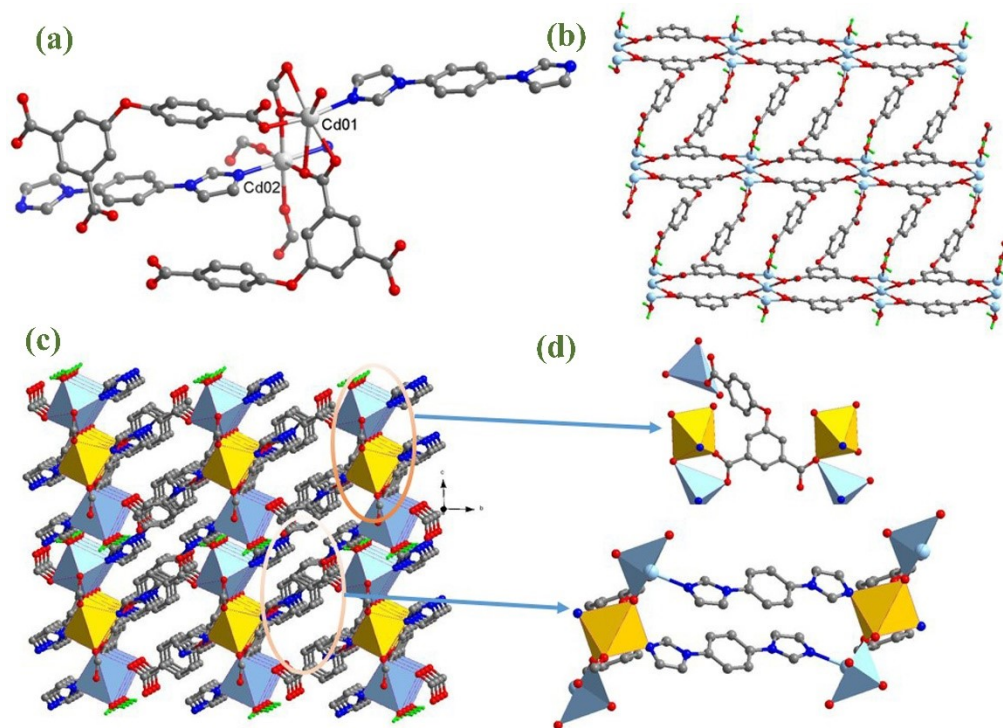

Figure S1 (a) the coordination geometry of the Cd(II) centers in 3, (b) 2D layer built by tricarboxylate and metal center; (c) 3D network; (d) different coordination modes of two coligands.

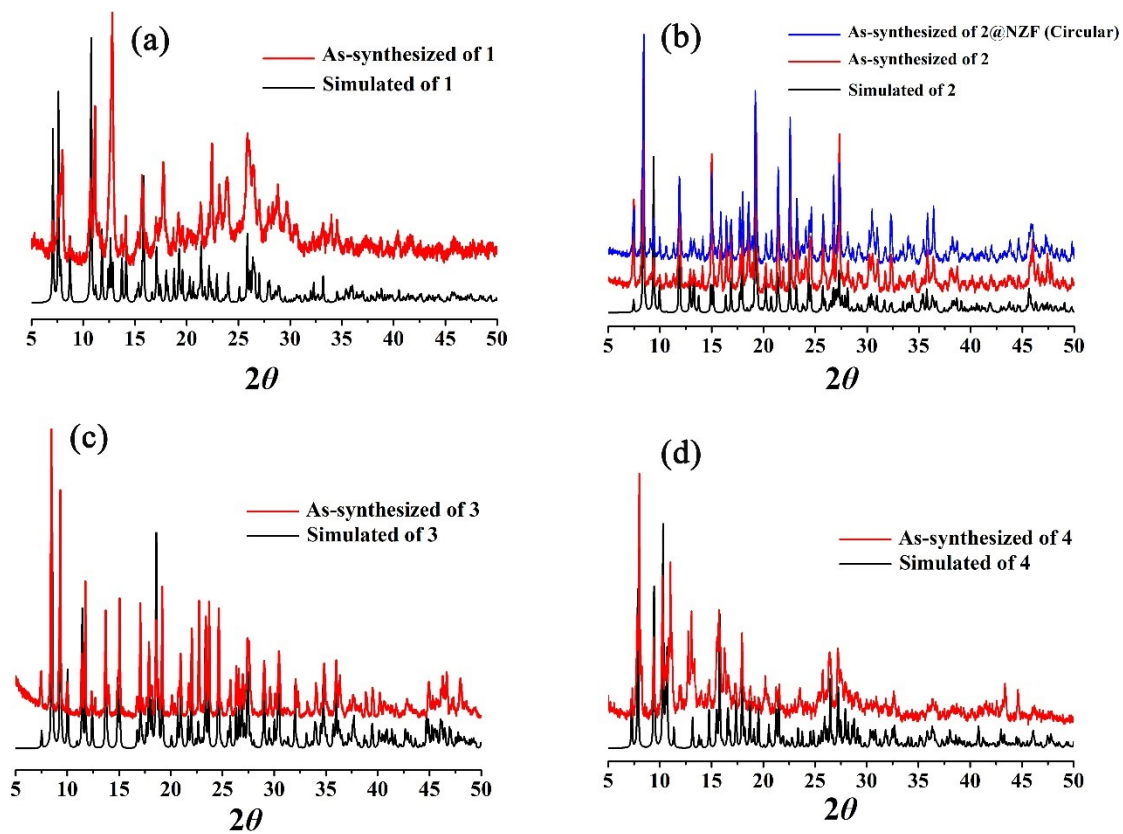

Figure S2 view of the different patterns of as-synthesized MOFs for 1-4.

### Thermogravimetric analysis

Thermal stability of compounds **1-4** was evaluated by thermogravimetric analysis (TGA) under nitrogen atmosphere. As shown in Fig. S3, compound **1** loses its lattice and two coordinated water molecules (exptl, 4.6%; calcd, 4.9%) in the 155-306 °C temperature range. The dehydrated sample remains stable up to 365 °C followed by the decomposition. For MOF **2**, there is one distinct thermal effect in the 37-260 °C range that corresponds to the removal of 2 lattice and 2 coordinated H<sub>2</sub>O molecules (exptl, 5.2%; calcd, 5.0%). A dehydrated sample remains stable up to ~329 °C. Similarly, MOF **3** shows the loss of two coordinated water molecules between 34 and 306 °C (exptl, 2.4%; calcd, 2.5%) and a dehydrated sample remains stable up to ~340 °C. For **4**, a dehydrated sample remains stable up to ~285 °C.

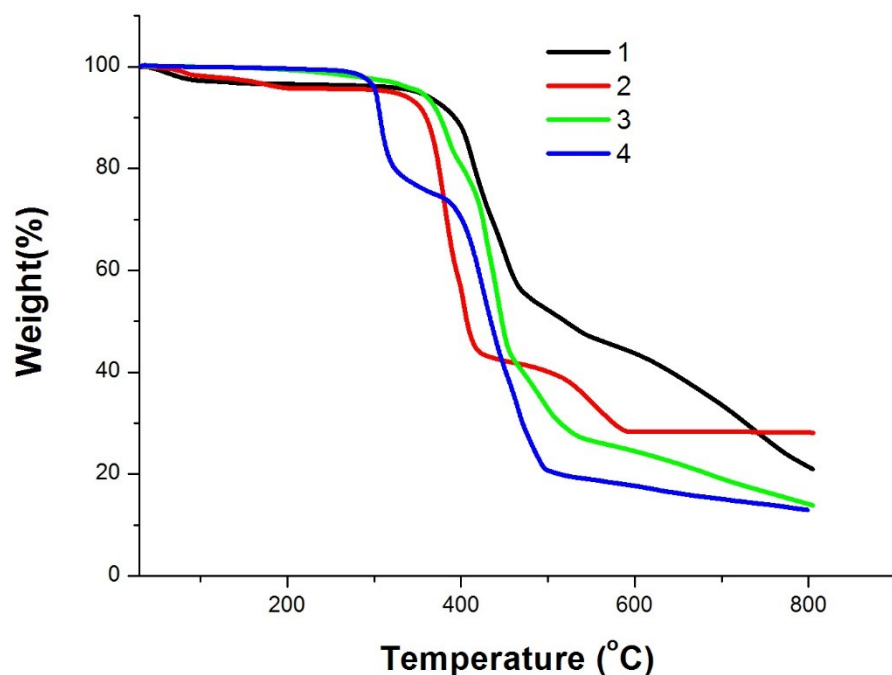

Figure S3 TGA curves of compounds **1-4**.

The IR spectra of **1-4** are determined in the frequency range of 400–4000 cm<sup>-1</sup>, as shown in Fig. S4. The bands around 3258 cm<sup>-1</sup> for **1-3** are characteristic of the vibrations of hydroxyl groups. The bands around 1628 and 1499 cm<sup>-1</sup> for **1-4** are characteristic of the asymmetric and symmetric vibrations of carboxyl groups. The strong peaks at 1320 cm<sup>-1</sup> for **1-4**, indicate the  $\nu_{C-N}$  stretching vibrations of the N-donor linker.

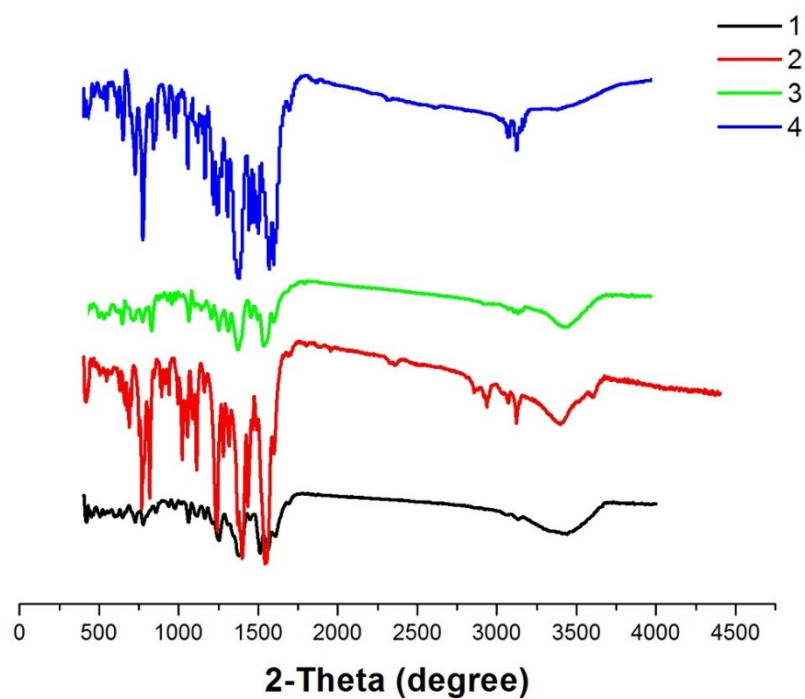

Figure S4 IR spectra of compounds 1-4.

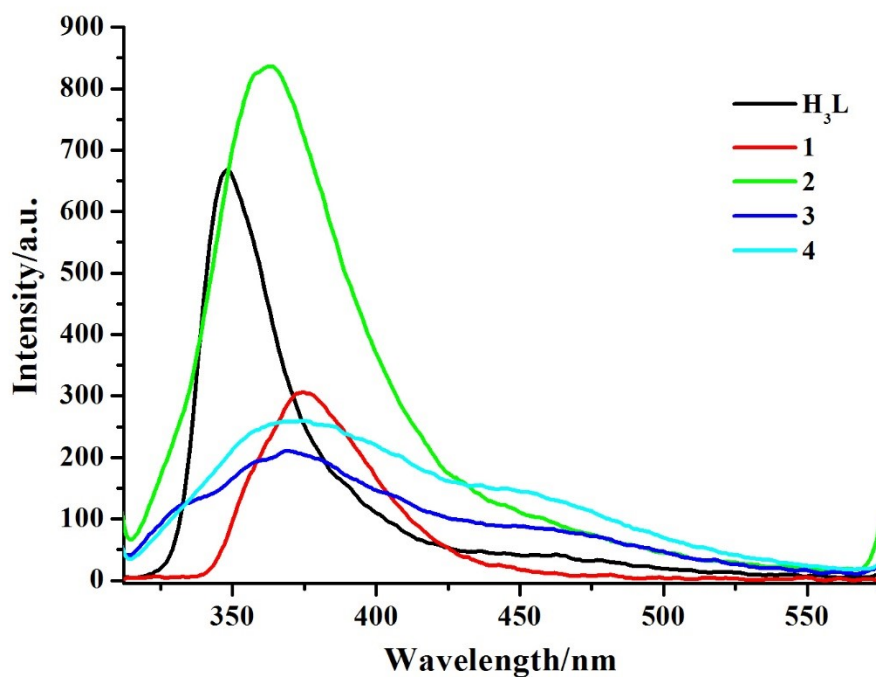

Fig. S5 photoluminescence spectra of 1-4 and the H<sub>3</sub>L ligand was recorded at room temperature.

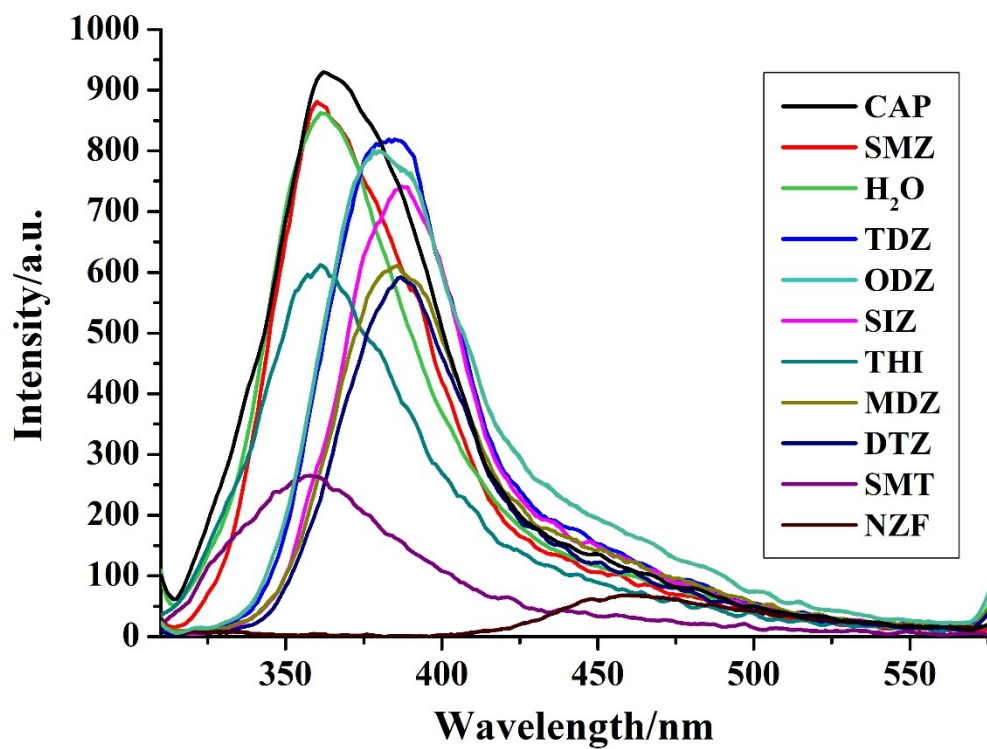

Fig. S6 photoluminescence spectra of **2** in the presence of different antibiotics was recorded at room temperature.

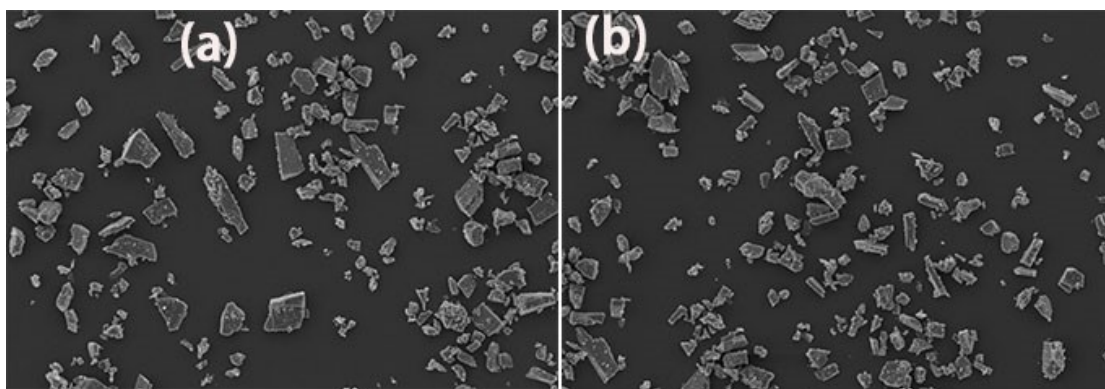

Fig. S7 Comparison of sample morphology changes before and after the probe in **2**.

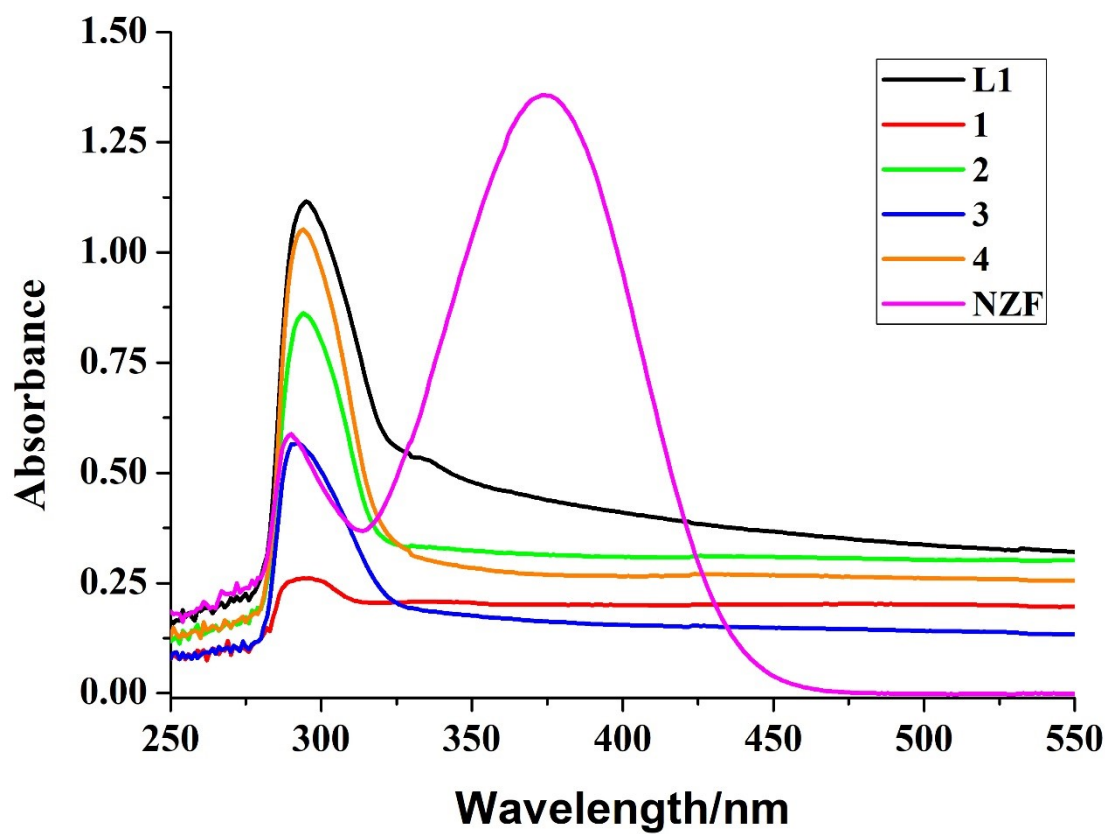

Fig. S8 The UV-vis spectra of the NFZ antibiotic, MOFs **1-4** and H<sub>3</sub>L at room temperature.
